# Supplementary material for: Dityrosine suppresses the cytoprotective action of thyroid hormone T3viainhibiting thyroid hormone receptor-mediated transcriptional activation
Source: Royal Society of Chemistry journal article supplement (doi:10.1039/d0ra00276c), 2020-01-01
Supplement: d0ra00276c1.pdf [file d0ra00276c1.pdf]

Supplementary table 1 Compositions of standard diets

| Compositions      | %     | Compositions       | %     |
|-------------------|-------|--------------------|-------|
| Corn flour        | 50.92 | Bean pulp          | 24.52 |
| Wheat flour       | 9.00  | Wheat bran         | 9.00  |
| NaCl              | 0.20  | CaHPO <sub>3</sub> | 1.20  |
| CaCO <sub>3</sub> | 1.60  | Soybean oil        | 2.80  |
| Mineral mixture   | 0.06  | Lysine             | 2.80  |
| Methionine        | 0.20  | Vitamin mixture    | 0.02  |
| Sucrose           | 0.10  | Choline chloride   | 0.10  |

Supplementary table 2 The primer's sequences for the genes

| Gene             | Forward (5'-3')         | Reverse (5'-3')           |
|------------------|-------------------------|---------------------------|
| <i>Bax</i>       | CCAGGATGCGTCCACCAAGA    | GCAAAGTAGAAGAGGGCAACCAC   |
| <i>caspase 3</i> | CTGGAGAAATTCAAAGGACGGG  | TGAGCATGGACACAATACACGG    |
| <i>Bcl-2</i>     | TCTTTGAGTTCGGTGGGGTCAT  | AGACAGCCAGGAGAAATCAAACAGA |
| <i>MCT8</i>      | CGGCTGGATAGTGGTGTTTG    | CAGAGTTATGGATGCCGAAGATG   |
| <i>Rxra</i>      | ATGGACACCAAACATTTCTCTGC | CCAGTGGAGAGCCGATTCC       |
| <i>Src-1</i>     | AAAGGATCGCCATGTGACACG   | TCTGCACGTCATCATCAGTCG     |
| <i>β actin</i>   | TGTCACCAACTGGGACGATA    | GGGGTGTGAAGGTCTCAAA       |
